# Supplementary material
Source: PubMed Central journal article supplement (PMC9554061)
Supplement: 12264_2022_902_MOESM1_ESM.pdf [file 12264_2022_902_MOESM1_ESM.pdf]

**Table S1** Patient data of TBI cases.

| Patient number | Gender | Age | Injured Brain zone | GCS | Reason for TBI |
|----------------|--------|-----|--------------------|-----|----------------|
| 1              | M      | 24  | Left hemisphere    | 5   | Car accident   |
| 2              | M      | 37  | Temporal lobe      | 8   | Unknown        |
| 5              | M      | 41  | Left hemisphere    | 4   | Fall accident  |

**Table S2** Antibodies used in this study.

| Antibody                                       | Company        | Reference    | Dilution | Application |
|------------------------------------------------|----------------|--------------|----------|-------------|
| $\alpha$ -SMA                                  | Invitrogen     | 14-9760-82   | 1:100    | IF          |
| PDGFR $\beta$                                  | Invitrogen     | MA5-15143    | 1:100    |             |
| PDGFR $\beta$                                  | Santa Cruz     | sc-374573    | 1:100    |             |
| Cit H3                                         | Abcam          | ab5103       | 1:200    |             |
| CD11b                                          | Novus          | NB600-1327SS | 1:200    |             |
| ZO-1                                           | Abcam          | ab221547     | 1:200    |             |
| DAPI                                           | Solarbio       | C0065        | 1:1000   |             |
| PB anti-mouse/human CD11b antibody clone M1/70 | Biologend      | 101224       | 1:100    | FACS        |
| PE rat anti-mouse CD11b clone M1/70            | BD Pharmingen  | 553311       | 1:100    |             |
| Fixable viability dye L/D eFluor™ 780          | Invitrogen     | 65-0865-14   | 1:500    |             |
| PerCP anti-mouse CD45 Antibody clone 30-F11    | Biologend      | 103130       | 1:400    |             |
| FITC rat anti-mouse CD13 cone R3-242           | BD Biosciences | 558744       | 1:20     |             |
| MPO                                            | R&D            | AF-3667      | 1:50     |             |
| PE-Cy7 rat anti-mouse LY6G clone 1A8           | BD Biosciences | 560601       | 1:200    |             |
| Cit H3                                         | Abcam          | ab5103       | 1:50     |             |

|                                      |                |            |        |             |
|--------------------------------------|----------------|------------|--------|-------------|
| PE rat anti-mouse CD31 Clone MEC13.3 | BD Biosciences | 563670     | 1:20   |             |
| Dectin-1                             | Novus          | NBP1-45514 | 1:1000 | <b>WB</b>   |
| p-c-Jun                              | CST            | 91952S     | 1:1000 |             |
| t-c-Jun                              | CST            | 9165       | 1:1000 |             |
| p-PKC $\zeta/\lambda$                | CST            | 9378       | 1:1000 |             |
| t-PKC $\zeta/\lambda$                | CST            | 2998       | 1:1000 |             |
| GAPDH                                | CST            | 5174       | 1:1000 |             |
| ZO-1                                 | Abcam          | ab216880   | 1:1000 |             |
| CD11b                                | Abcam          | ab133357   | 1:1000 |             |
| c-Jun                                | CST            | 9165       | 1:50   | <b>CHIP</b> |

**Table S3** Specific primers for qRT-PCR analysis.

| Gene name                                 | Forward primer           | Reverse primer         |
|-------------------------------------------|--------------------------|------------------------|
| <i>CD11b</i><br>(mouse)                   | CAGATCAACAATGTGACCGTATGG | CATCATGTCCTTGTACTGCCGC |
| <i>GAPDH</i><br>(mouse)                   | AGGTTGTCTCCTGCGACTTCA    | TGGTCCAGGGTTTCTTACTCC  |
| <i>TNF-<math>\alpha</math></i><br>(mouse) | ACCACGCTCTTCTGTCTACT     | AGGAGGTTGACTTTCTCCTG   |
| <i>IL-1<math>\beta</math></i><br>(mouse)  | ACTGTTTCTAATGCCTTCCC     | ATGGTTTCTTGTGACCCTGA   |
| <i>CCL5</i><br>(mouse)                    | CCTGCTGCTTTGCCTACCTCTC   | ACACACTTGGCGGTTTCTTCGA |
| <i>MMP9</i><br>(mouse)                    | GCCCTGGAACCTCACACGACA    | TTGGAAACTCACACGCCAGAAG |

**Table S4** CHIP primers for promoter sequences.

| Binding sites | Forward primer           | Reverse primer        |
|---------------|--------------------------|-----------------------|
| <i>SF1</i>    | AAATGTGTCAAGATGAAGAGAAGG | CAAAGCACCTTTACCTGCCAC |
| <i>SF2</i>    | CAGGTGGTCAGCGCTTAGTG     | ACACCCACATACATACGGCAT |
